# Supplementary material for: Bacterial Nanocellulose as a Scaffold for In Vitro Cell Migration Assay
Source: MDPI journal article supplement (doi:10.3390/nano11092322), 2021-09-07
Supplement: s1 [file s1]

# Bacterial Nanocellulose as a Scaffold for *In Vitro* Cell Migration Assay

Milena Ugrin <sup>1</sup>, Jelena Dinic <sup>2</sup>, Sanja Jeremic <sup>1</sup>, Sandra Dragicevic <sup>1</sup>, Bojana Banovic Djeri <sup>1</sup> and Aleksandra Nikolic <sup>1,\*</sup>

<sup>1</sup> Institute of Molecular Genetics and Genetic Engineering, University of Belgrade, Vojvode Stepe 444A, 11042 Belgrade, Serbia; milena.ugrin@imgge.bg.ac.rs (M.U.); sanjajeremic@imgge.bg.ac.rs (S.J.); sandra.d@imgge.bg.ac.rs (S.D.); bojanabanovic@imgge.bg.ac.rs (B.B.D.)

<sup>2</sup> Department of Neurobiology, Institute for Biological Research “Sinisa Stankovic” — National Institute of Republic of Serbia, University of Belgrade, Bulevar Despota Stefana 142, 11060 Belgrade, Serbia; jelena.dinic@ibiss.bg.ac.rs

\* Correspondence: aleksni@imgge.bg.ac.rs

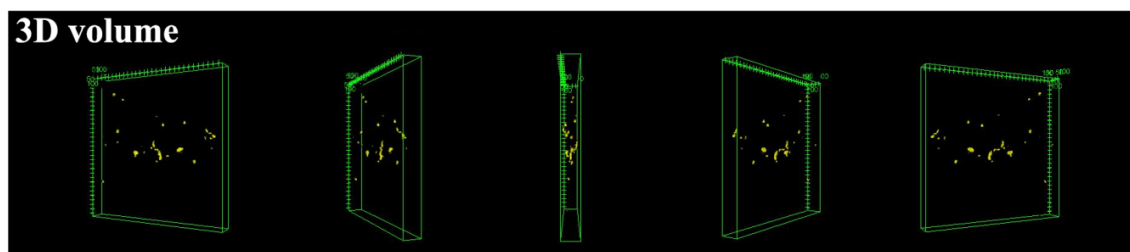

**Figure S1.** Representative 3D volume images of Cell Trace™ CFSE-labeled SW480 cells in the bacterial nanocellulose scaffold 48 h after seeding. The frames were taken from Supplementary Video S1. The thickness of the z-stack used to create 3D volume was 285  $\mu\text{m}$ .
